# Supplementary material for: Multivariate benthic ecosystem functioning in the Arctic – benthic fluxes explained by environmental parameters in the southeastern Beaufort Sea
Source: Copernicus journal article supplement (doi:10.5194/bgd-9-16933-2012), 2012-11-30
Supplement: Supplementary file 1 [file bg-2012-473-supplement-version2-upload.doc]

# Multivariate benthic ecosystem functioning in the Arctic - Benthic fluxes explained by environmental parameters in the southeastern Beaufort Sea

H. Link1, G. Chaillou2, A. Forest3, D. Piepenburg4 and P. Archambault1,*

[1] Institut des Sciences de la Mer, Université du Québec à Rimouski, Rimouski, Canada

[2] Canada Research Chair in the Geochemistry of Coastal Hydrogeosystems Department of Biology, Chemistry and Geography, Université du Québec à Rimouski, Rimouski, Canada

[3] Takuvik Joint International Laboratory, UMI3376, Université Laval (Canada) – CNRS (France), Département de Biologie and Québec-Océan, Université Laval, Québec, G1V 0A6, Canada

[4] Mainz Academy of Sciences, the Humanities and Literature, c/o Institute for Polar Ecology of the University of Kiel, Kiel, Germany

Correspondence to: H. Link (link.heike@gmail.com), G. Chaillou (gwenaelle_chaillou@uqar.ca)

Supplementary tables

Table S1:Fluxes of oxygen (O2), silicic acid (Si(OH)4), phosphate (PO42-), nitrate (NO3-), nitrite (NO2-), and ammonium (NH4+) across the sediment-water interface determined for three replicates at eight stations in the southeastern Beaufort Sea in July/August 2009. * denotes an outlier that has been excluded from statistical analyses following Cook’s D analysis

| Malina  Label | O2 flux  [mmol m-2 d-1] | Si(OH)4  [µmol m-2 d-1] | PO42-  [µmol m-2 d-1] | NO3-  [µmol m-2 d-1] | NO2-  [µmol m-2 d-1] | NH4+  [µmol m-2 d-1] |
| --- | --- | --- | --- | --- | --- | --- |
|  |  |  |  |  |  |  |
| 390 | -9.51 | -352.13* | -41.07 | -785.06 | -25.84 | -44.61 |
|  | -11.47 | 3494.65 | 23.25 | -597.91 | -4.28 | 281.00 |
|  | -10.59 | 2478.59 | -44.26 | -378.09 | 14.39 | 443.30 |
|  |  |  |  |  |  |  |
| 690 | -8.84 | 1171.44 | -46.35 | -345.32 | -43.57 | -30.80 |
|  | -8.13 | 1082.16 | -57.66 | -631.51 | -15.90 | -66.95 |
|  | -8.48 | 947.69 | -39.14 | -324.24 | -29.15 | 31.38 |
|  |  |  |  |  |  |  |
| 260 | -5.41 | 2092.55 | 17.29 | 10.59 | -7.10 | 21.24 |
|  | -4.29 | 1347.74 | 27.55 | 21.24 | -7.49 | 60.89 |
|  | -3.42 | 1377.07 | 15.51 | 41.35 | -7.94 | -53.54 |
|  |  |  |  |  |  |  |
| 110 | -0.98 | 867.21 | 3.21 | 90.24 | -3.24 | 4.35 |
|  | -1.31 | 763.65 | 0.38 | -27.85 | -3.51 | -13.74 |
|  | -0.70 | 599.41 | -0.85 | -22.68 | -1.99 | 5.19 |
|  |  |  |  |  |  |  |
| 140 | -3.26 | 1776.83 | 13.24 | 16.45 | -2.76 | -56.18 |
|  | -2.41 | 1798.87 | 15.24 | 362.94 | -9.93 | -54.90 |
|  | -2.33 | 2819.58 | 40.67 | 193.84 | -0.77 | -48.62 |
|  |  |  |  |  |  |  |
| 680 | -4.32 | 1283.23 | 11.08 | -238.66 | -3.37 | -10.52 |
|  | -5.04 | 1356.21 | 19.59 | -120.99 | 0.18 | 6.75 |
|  | -4.45 | 1232.46 | 17.25 | -158.03 | -3.08 | -13.49 |
|  |  |  |  |  |  |  |
| 345 | -0.53 | 437.34 | 13.40 | 92.78 | -0.65 | 1.02 |
|  | -0.54 | 329.21 | 9.32 | -2.08 | -0.45 | -2.68 |
|  | -0.81 | 481.38 | 6.20 | 25.01 | 3.40 | 3.25 |
|  |  |  |  |  |  |  |
| 235 | -0.86 | 363.63 | -0.37 | -24.75 | -1.39 | -16.58 |
|  | -0.63 | 457.30 | 5.90 | 132.52 | -2.09 | -14.16 |
|  | -0.52 | 314.54 | 0.56 | -26.89 | -1.71 | -16.37 |
|  |  |  |  |  |  |  |

Table S2: Replicate values of abiotic parameters measured in the overlying bottom water and at the sediment surface used as environmental variables tested to explain the distribution of the benthic fluxes. Dissolved oxygen (DBO), porosity, Mn- and Fe-oxide contents, stable isotope signature of the surficial organic matter, and pigment contents are presented. Sinking POC estimated at the bottom of the water column by Forest et al. (2012)

| Malina | DBO | Porosity | MnHCl | FeHCl | δ15Ntot | δ13Corg | Chl *a* | Phaeo | Sinking |
| --- | --- | --- | --- | --- | --- | --- | --- | --- | --- |
| Label | µM |  | µmol/g | µmol/g | ‰ | ‰ | µg/g | µg/g | POC |
|  |  |  |  |  |  |  |  |  |  |
| 390 | 270 | 0.87 | 6.1 | 337.78 | 4.72 | -26.22 | n.d. | n.d. | 3441.1 |
|  | 271 | 0.86 | 3.94 | 347.38 | 3.96 | -26.11 | 3.81 | 9.15 |  |
|  | 272 | 0.89 | 8.63 | 363.67 | 5.45 | -26.04 | 3.89 | 10.91 |  |
|  |  |  |  |  |  |  |  |  |  |
| 690 | 308 | 0.83 | 19.13 | 315.82 | 3.79 | -26.57 | 1.11 | 5.13 | 1465.3 |
|  | 308 | 0.82 | 22.52 | 322.47 | 7.15 | -26.55 | 1.23 | 7.23 |  |
|  | 308 | 0.80 | 10.31 | 324.31 | 4.72 | -25.96 | 1.68 | 5.73 |  |
|  |  |  |  |  |  |  |  |  |  |
| 260 | 311 | 0.78 | 2.49 | 264.04 | 5.32 | -25.39 | 1.23 | 11.37 | 734.3 |
|  | 311 | 0.78 | 2.75 | 246.73 | 7.01 | -25.55 | 1.03 | 6.05 |  |
|  | 311 | 0.78 | n.d. | 208.47 | 5.45 | -25.75 | 1.43 | 8.18 |  |
|  |  |  |  |  |  |  |  |  |  |
| 110 | 273 | 0.81 | 85.09 | 355.27 | 6.74 | -24.00 | 0.13 | 3.56 | 20.5 |
|  | 273 | 0.83 | n.d. | 355.46 | 7.81 | -24.45 | 0.09 | 2.92 |  |
|  | 273 | 0.85 | 88.56 | 355.27 | 7.12 | -24.08 | 0.15 | 4.63 |  |
|  |  |  |  |  |  |  |  |  |  |
| 140 | 282 | 0.82 | n.d. | 309.17 | 5.54 | -25.27 | 0.86 | 6.31 | 49.8 |
|  | 282 | 0.86 | 36.81 | 408.35 | 6.49 | -25.39 | 1.36 | 10.81 |  |
|  | 282 | 0.87 | 1 .02 | 427.64 | 6.00 | -25.22 | 0.90 | 10.70 |  |
|  |  |  |  |  |  |  |  |  |  |
| 680 | 303 | 0.80 | 3.42 | 312.42 | 4.42 | -26.41 | 2.95 | 9.25 | 619.2 |
|  | 303 | 0.76 | 3.32 | 318.53 | 3.86 | -25.96 | 1.99 | 7.29 |  |
|  | 303 | 0.73 | 8.76 | 294.95 | 4.55 | -25.49 | 1.67 | 6.28 |  |
|  |  |  |  |  |  |  |  |  |  |
| 345 | 299 | 0.81 | 48.72 | 334.90 | 5.77 | -25.12 | 0.04 | 1.27 | 17.8 |
|  | 300 | 0.76 | 59.84 | 324.99 | 5.66 | -24.55 | 0.08 | 2.24 |  |
|  | 301 | 0.81 | 47.83 | 347.42 | 5.76 | -25.36 | 0.03 | 1.87 |  |
|  |  |  |  |  |  |  |  |  |  |
| 235 | 298 | 0.80 | 64.85 | 303.59 | 5.63 | -27.37 | 0.52 | 8.89 | 28.3 |
|  | 298 | 0.80 | 61.89 | 323.67 | 5.68 | -24.89 | 0.07 | 1.87 |  |
|  | 298 | 0.85 | 59.29 | 328.23 | 5.77 | -24.72 | 0.02 | 1.71 |  |
